# Supplementary material
Source: PubMed Central journal article supplement (PMC6708036)
Supplement: 10815_2019_1461_MOESM1_ESM.pdf [file 10815_2019_1461_MOESM1_ESM.pdf]

# Fig. 4, Fig. 5 & Fig. 6 as supplements

## VEGF Gene

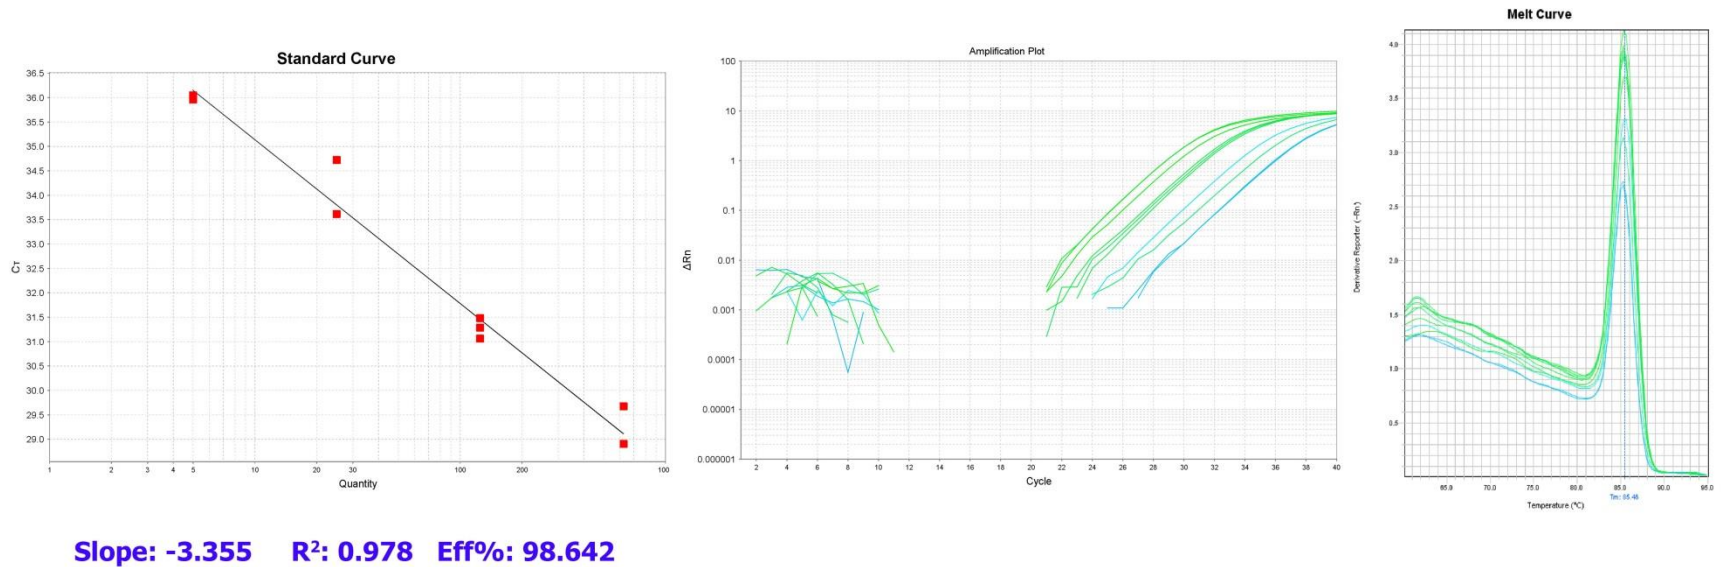

**Fig. 4 (supplement): Standard curve and unique melting curve of VEGF gene**

# HIF1 Gene

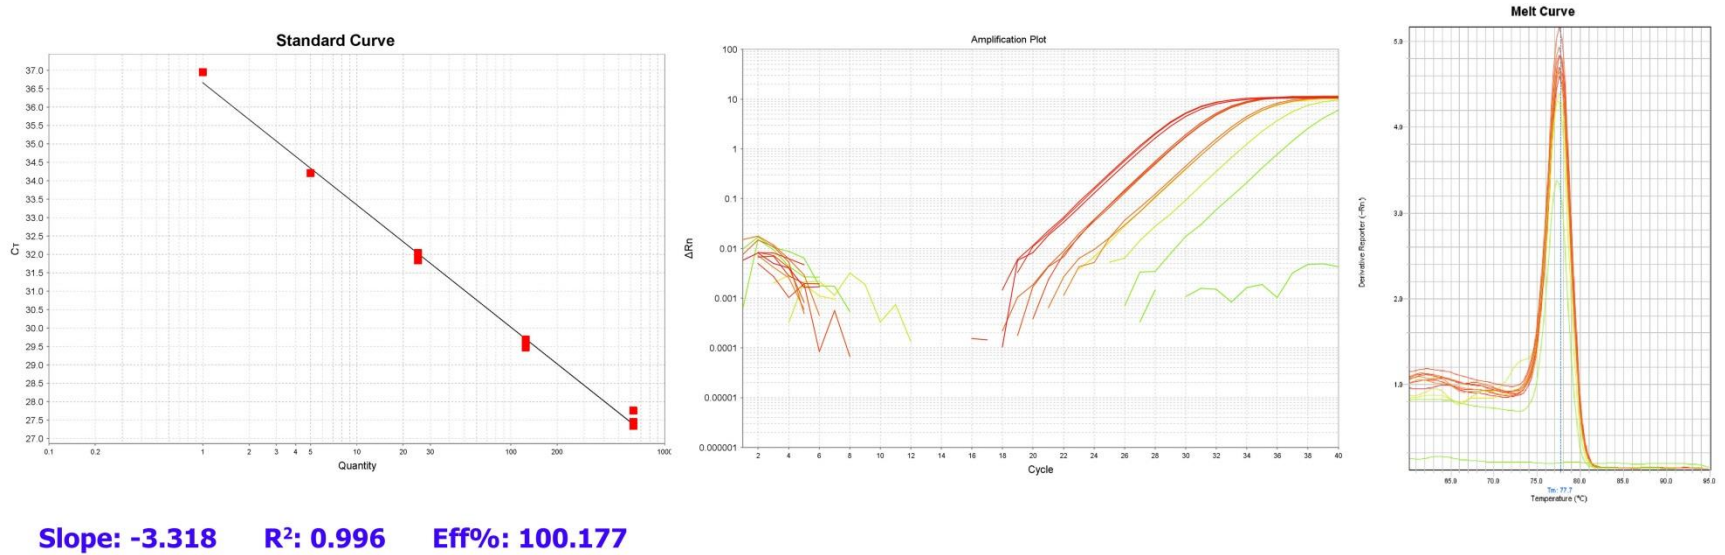

**Fig. 5 (supplement): Standard curve and unique melting curve of *HIF1* gene**

# GAPDH Gene

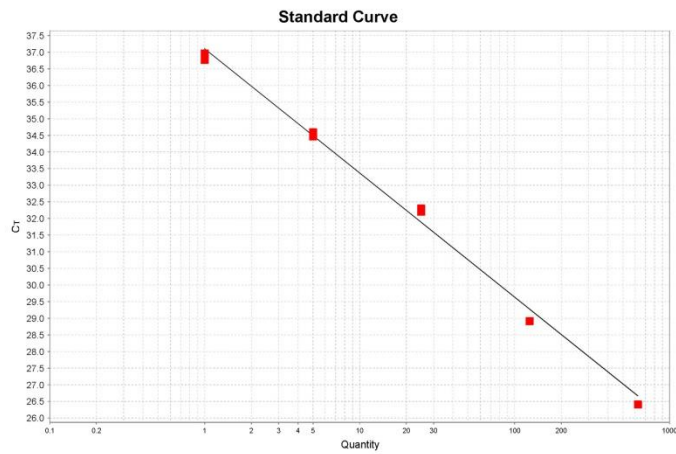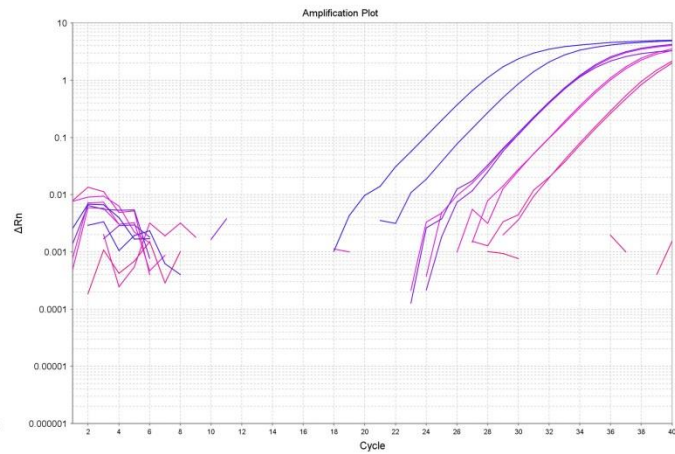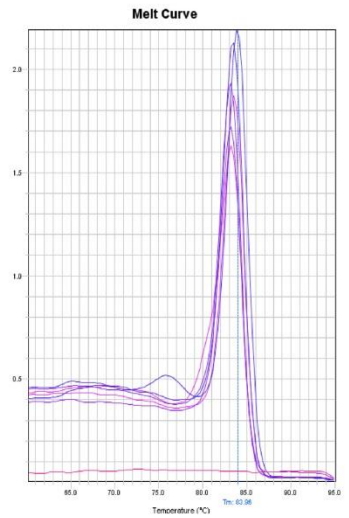

Slope: -3.25 R<sup>2</sup>: 0.995 Eff%: 103.092

**Fig. 6 (supplement): Standard curve and unique melting curve of *GAPDH* gene**
